# Supplementary material
Source: PubMed Central journal article supplement (PMC1413844)

**A**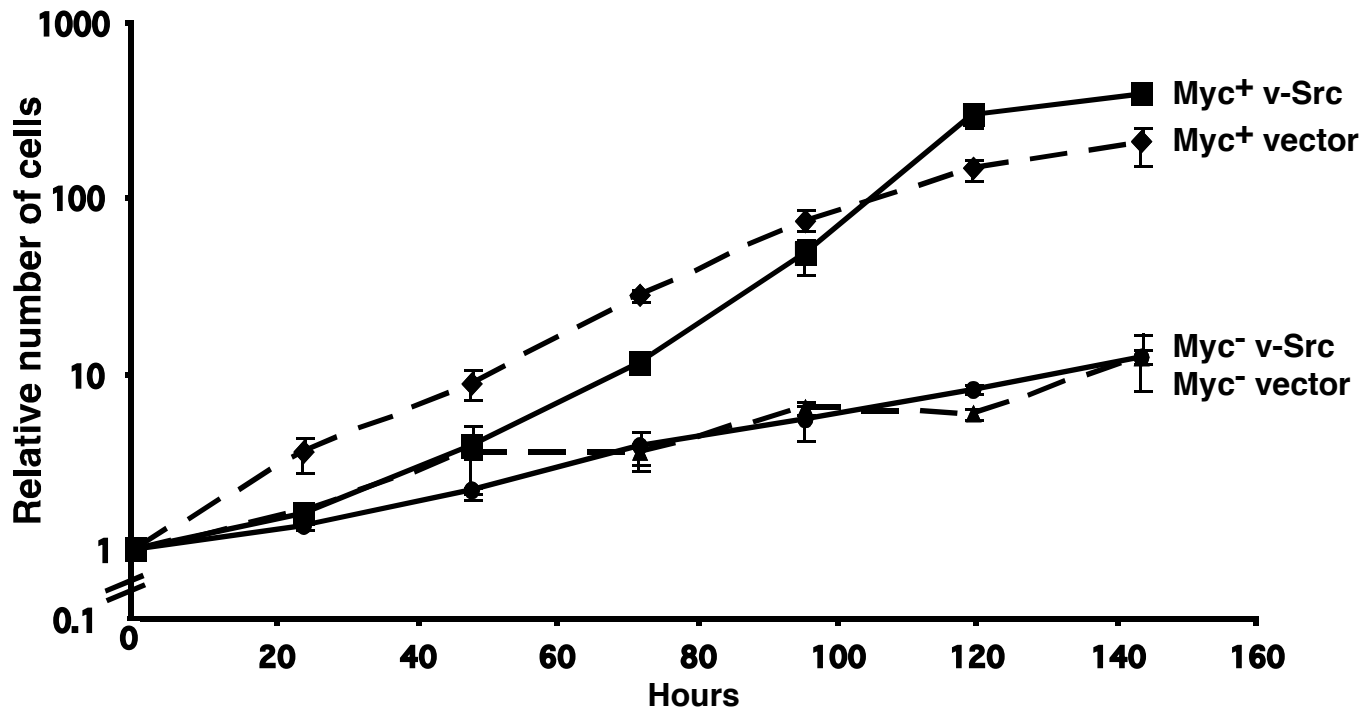**B**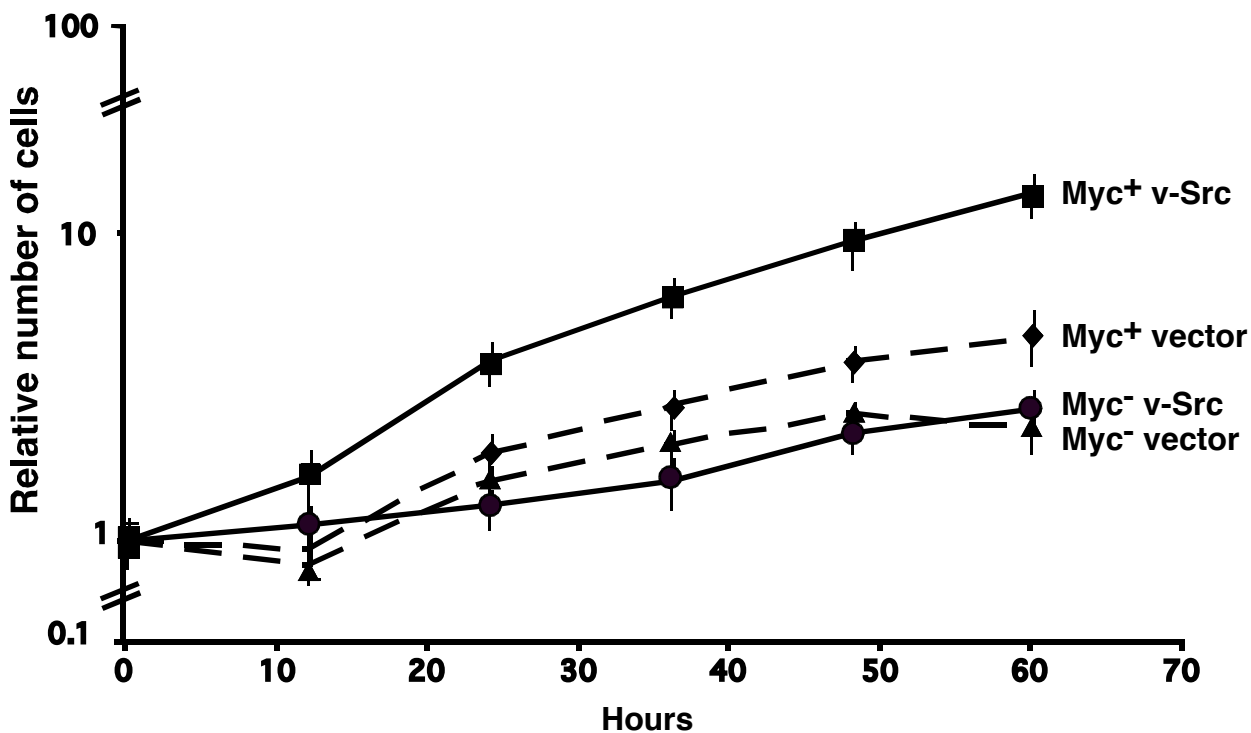

Supplement: pnas_0511186103_1.pdf [file pnas_0511186103_1.pdf]
